# Supplementary material
Source: PubMed Central journal article supplement (PMC3037594)
Supplement: NIHMS262488-supplement-1_si_001.pdf [file NIHMS262488-supplement-1_si_001.pdf]

**Molecular and Structural Insight into the Role of Key Residues of Thrombospondin-1 and  
Calreticulin in Thrombospondin-1-Calreticulin Binding**

Running Title: Structural bases for the role of key residues of TSP1 and CRT in TSP1-CRT interactions

Qi Yan<sup>1</sup>, Joanne E. Murphy-Ullrich<sup>2</sup>, Yuhua Song<sup>1\*</sup>

<sup>1</sup>Department of Biomedical Engineering, <sup>2</sup>Department of Pathology, The University of Alabama  
at Birmingham, Birmingham, AL 35294

\* To whom correspondence should be addressed:  
Department of Biomedical Engineering  
The University of Alabama at Birmingham  
803 Shelby Interdisciplinary Biomedical Research Building  
1825 University Boulevard  
Birmingham, AL 35294  
Phone: (205) 996-6939 Fax: (205) 975-4919  
E-mail: yhsong@uab.edu  
Web: <http://www.eng.uab.edu/yhsong>

† This work was supported by TeraGrid supercomputer allocation (NSF- MCB090009) to Y.H.Song, and NIH HL79644 to J.E.MU.

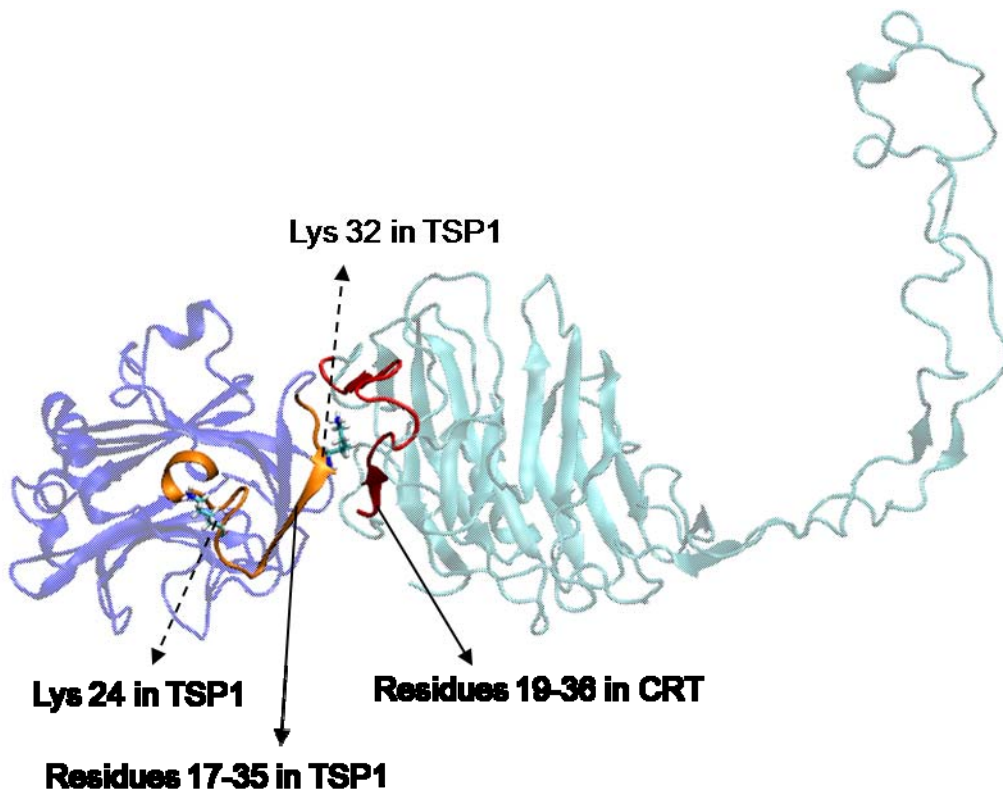

**Figure 1S.** TSP1-CRT complex. Blue: TSP1; orange: CRT binding site in TSP1 (residues 17-35 in TSP1); cyan: CRT; red: TSP1 binding site in CRT (residues 19-36 in CRT); residues represented with licorice are the key residues of Lys 32 and Lys 24 in TSP1 critical for TSP1-CRT binding (ref. 20). Image was made with VMD software support.

### Constant force steered molecular dynamics simulations

We applied the constant external force of 20 pN on the  $C_{\alpha}$  atom of each residue on beta sheets of TSP1 except the residues in CRT binding site. The residues in the structurally stable N-domain and the partial C-domain of CRT, except the residues in the binding site for TSP1, were treated as rigid and were fixed, and leave the structurally flexible P-domain of CRT as unfixed and flexible region. The pulling direction was along the center of the mass of the pulled residues and the fixed residues. 96 residues in TSP1 experienced the external force. The total external

force applied to the TSP1-CRT complex for SMD simulations was 1920 pN. The extension profiles over time in the constant force SMD simulations for the TSP1-CRT complex and its mutants were obtained. The calculated results about the effect of residues 24 and 32 mutations of TSP1 and the mutation of residues 24-26 and 32-34 to Ala in CRT on TSP1-CRT unbinding were compared with experimental results for the validation.

Under the constant force SMD simulations, the extension profile for TSP1-CRT complex, TSP1 K24A&K32A mutant-CRT complex and the TSP1-CRT mutant complex showed that under the same external load pulling, it took longer time for causing the significantly increased distance between the centers of the mass of the binding sites of the TSP1-CRT complex for the wildtype TSP1-CRT complex than its mutants (Fig. 2S). The results showed that TSP1 K24A&K32A mutations in TSP1 and the mutations of amino acids 24-26 and 32-34 in CRT to Ala significantly decreased the binding strength between TSP1 and CRT, which was validated with the experimental results (ref. 3, 7, 16).

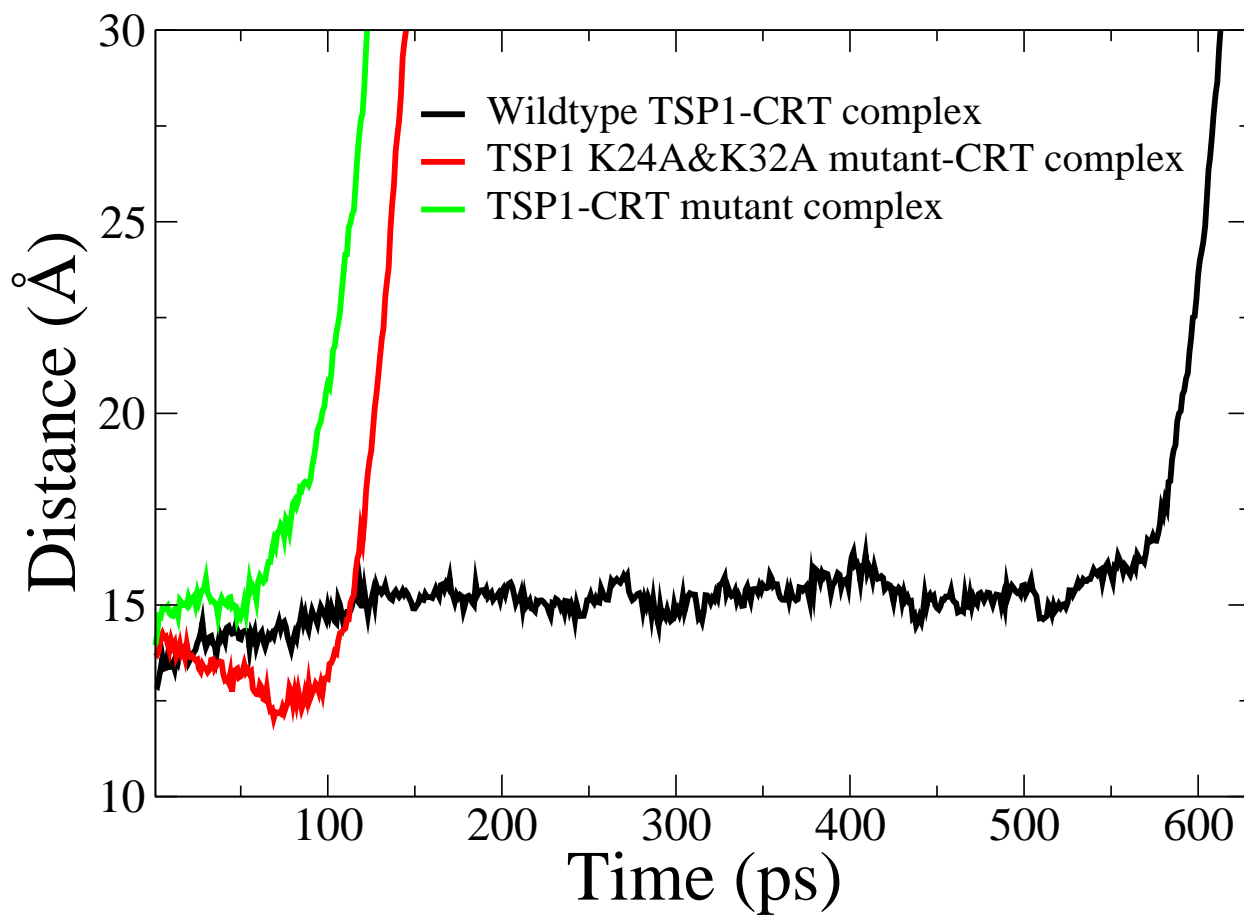

**Figure 2S** The distances between the centers of mass of the binding sites for wildtype TSP1-CRT complex, TSP1 K24A&K32A mutant-CRT complex and TSP1-CRT mutant under the constant force SMD simulations.

### RMSD of TSP1 and its mutant

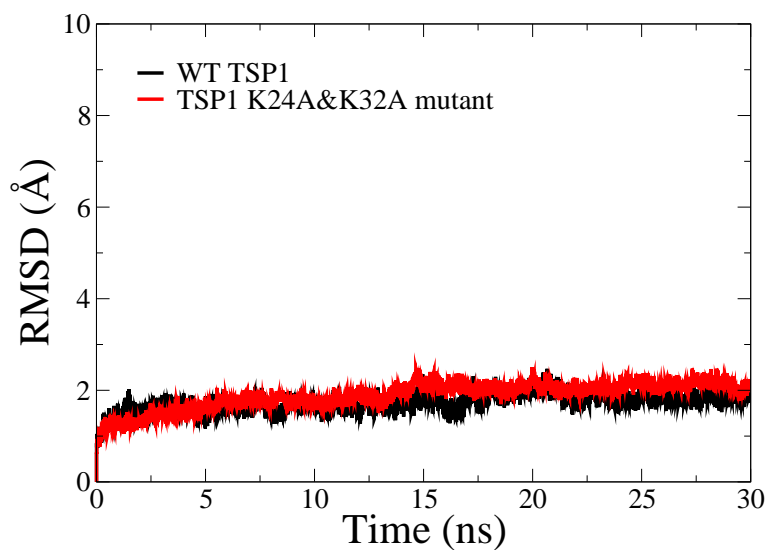

Figure 3S RMSD for TSP1-N domain over the 30ns MD simulation.

### RMSD of CRT at ...

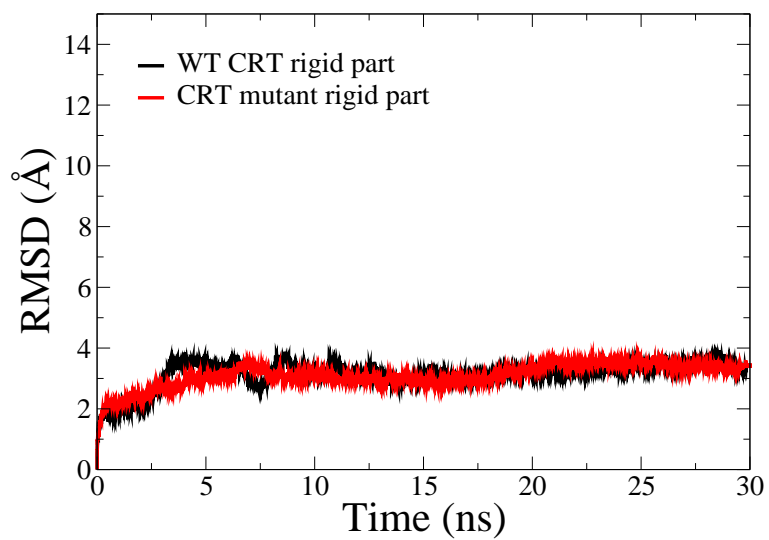

Figure 4S RMSD for CRT N-domain and the partial C-domain over the 30ns MD simulation

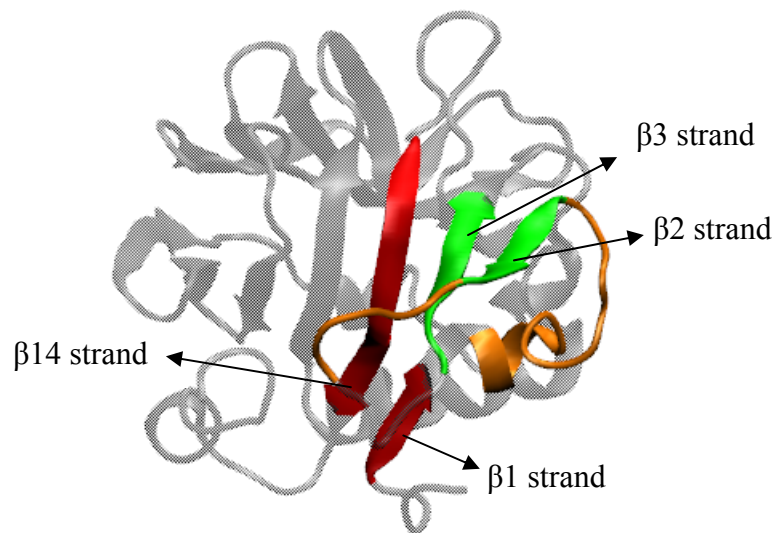

**Figure 5S.** TSP1 N-domain structure . Orange: CRT binding site in TSP1 (residues 17-35); green:  $\beta 2$  and  $\beta 3$  strands; red:  $\beta 1$  and  $\beta 14$  strands; grey: regions of TSP1 N-domain except CRT binding site in TSP1,  $\beta 1$ ,  $\beta 2$ ,  $\beta 3$  and  $\beta 14$  strands.

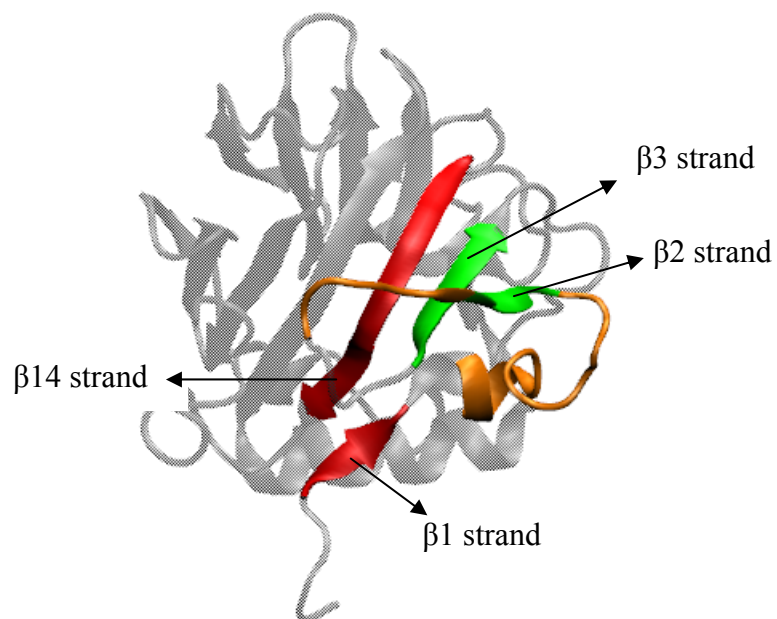

**Figure 6S.** Structure of TSP1 N-domain K24A & K32A mutant. Orange: CRT binding site in TSP1 (residues 17-35); green:  $\beta 2$  and  $\beta 3$  strands; red:  $\beta 1$  and  $\beta 14$  strands; grey: regions of TSP1 N-domain except CRT binding site in TSP1,  $\beta 1$ ,  $\beta 2$ ,  $\beta 3$  and  $\beta 14$  strands.

**Table 1S Occupancy of the hydrogen bond formed between residues in the  $\beta$  strands of TSP1 and its mutant over the last 20ns MD simulation trajectories.**

|                        |          | Wildtype TSP1  |          | TSP1 K24A&K32A mutant |  |
|------------------------|----------|----------------|----------|-----------------------|--|
|                        |          | donor-acceptor |          | donor-acceptor        |  |
| $\beta 1$ - $\beta 14$ | F13-F199 | 83.6%          | F13-F199 | 74.9%                 |  |
|                        | F199-F13 | 82.8%          | F199-F13 | 87.8%                 |  |
|                        | I15-V197 | 87.4%          | I15-V197 | 39.1%                 |  |
| $\beta 2$ - $\beta 3$  | V31-A40  | 88.5%          | V31-A40  | 89.0%                 |  |
|                        | R29-R42  | 59.6%          | R29-R42  | 67.2%                 |  |
|                        | R42-R29  | 74.2%          | R42-R29  | 76.9%                 |  |
|                        | E44-G27  | 67.8%          | E44-G27  | 5.4%                  |  |
| $\beta 5$ - $\beta 10$ | L76-K136 | 92.8%          | L76-K136 | 93.3%                 |  |
|                        | K136-L76 | 79.1%          | K136-L76 | 85.3%                 |  |
|                        | L72-L140 | 85.2%          | L72-L140 | 71.1%                 |  |
|                        | L140-L72 | 81.8%          | L140-L72 | 71.1%                 |  |
|                        | A74-I138 | 76.4%          | A74-I138 | 82.0%                 |  |
|                        | I138-A74 | 89.2%          | I138-A74 | 91.7%                 |  |
|                        | F70-V142 | 62.7%          | F70-V142 | 53.6%                 |  |
|                        | V142-F70 | 83.8%          | V142-F70 | 83.2%                 |  |
| $\beta 5$ - $\beta 14$ | L73-R198 | 87.4%          | L73-R198 | 91.8%                 |  |
|                        | R198-L73 | 80.2%          | R198-L73 | 84.4%                 |  |
|                        | R77-V193 | 75.4%          | R77-V193 | 79.5%                 |  |
|                        | V193-R77 | 84.2%          | V193-R77 | 89.1%                 |  |
| $\beta 6$ - $\beta 7$  | L87-V101 | 88.9 %         | L87-V101 | 86.0 %                |  |
|                        | V101-L87 | 54.5%          | V101-L87 | 62.0%                 |  |

|                         |           |       |           |       |
|-------------------------|-----------|-------|-----------|-------|
|                         | L89-F99   | 67.6% | L89-F99   | 54.8% |
|                         | F99-L89   | 72.5% | F99-L89   | 27.4% |
| $\beta 6$ - $\beta 13$  | A88-R180  | 91.3% | A88-R180  | 77.4% |
|                         | R180-A88  | 89.9% | R180-A88  | 89.2% |
| $\beta 7$ - $\beta 8$   | V102-D111 | 90.8% | V102-D111 | 87.9% |
|                         | D111-V102 | 72.1% | D111-V102 | 65.6% |
|                         | N104-T109 | 82.3% | N104-T109 | 80.1% |
|                         | T109-N104 | 41.6% | T109-N104 | 51.2% |
|                         | S100-S113 | 68.6% | S100-S113 | 73.5% |
|                         | S113-S100 | 77.4% | S113-S100 | 49.3% |
| $\beta 8$ - $\beta 9$   | L110-V125 | 81.9% | L110-V125 | 76.2% |
|                         | V125-L110 | 79.4% | V125-L110 | 77.1% |
|                         | L112-V123 | 72.4% | L112-V123 | 68.4% |
|                         | V123-L112 | 77.3% | V123-L112 | 52.0% |
| $\beta 10$ - $\beta 11$ | Q143-R146 | 66.1% | Q143-R146 | 88.6% |
|                         | R146-Q143 | 67.4% | R146-Q143 | 61.6% |
|                         | T139-Y150 | 80.3% | T139-Y150 | 78.4% |
|                         | Y150-T139 | 63.2% | Y150-T139 | 67.5% |
|                         | F141-Q148 | 82.8% | F141-Q148 | 84.9% |
|                         | Q148-F141 | 84.1% | Q148-F141 | 77.6% |
| $\beta 11$ - $\beta 12$ | L149-E157 | 86.2% | L149-E157 | 87.8% |
|                         | E157-L149 | 60.6% | E157-L149 | 74.1% |
|                         | A147-A159 | 83.9% | A147-A159 | 82.9% |
|                         | A159-A147 | 53.8% | A159-A147 | 61.6% |



|           |       |           |       |
|-----------|-------|-----------|-------|
| I151-K155 | 78.6% | I151-K155 | 87.8% |
| K155-I151 | 68.9% | K155-I151 | 71.2% |

**Table 2S Occupancy of the hydrogen bond formed between residues in the  $\beta$  strands of CRT and its mutant over the last 20ns MD simulation trajectories.**

|                       | Wildtype<br>CRT |       | CRT mutant (res 24-26&32-34<br>mutated to Ala) |       |
|-----------------------|-----------------|-------|------------------------------------------------|-------|
|                       | donor-acceptor  |       | donor-acceptor                                 |       |
| $\beta$ 2- $\beta$ 3  | V33-Q50         | 89.5% | A33-Q50                                        | 0.0%  |
|                       | Q50-V33         | 81.1% | Q50-A33                                        | 0.1%  |
|                       | S35-G48         | 80.5% | S35-G48                                        | 75.9% |
|                       | G48-S35         | 82.8% | G48-S35                                        | 59.2% |
| $\beta$ 5- $\beta$ 12 | L74-V159        | 79.3% | L74-V159                                       | 72.5% |
|                       | V159-L74        | 90.8% | V159-L74                                       | 87.7% |
|                       | V76-L157        | 84.8% | V76-L157                                       | 93.7% |
|                       | L157-V76        | 87.8% | L157-V76                                       | 94.2% |
| $\beta$ 6- $\beta$ 8  | G89-I119        | 79.1% | G89-I119                                       | 0.0%  |
|                       | I119-G89        | 0.0%  | I119-G89                                       | 77.0% |
| $\beta$ 7- $\beta$ 8  | V93-F115        | 68.7% | V93-F115                                       | 90.1% |
|                       | F115-V93        | 72.4% | F115-V93                                       | 87.8% |
|                       | L95-I113        | 68.6% | L95-I113                                       | 73.8% |
|                       | I113-L95        | 87.2% | I113-L95                                       | 85.5% |
| $\beta$ 8- $\beta$ 9  | M114-I130       | 52.0% | M114-I130                                      | 74.3% |

|         |           |       |           |       |
|---------|-----------|-------|-----------|-------|
|         | I130-M114 | 67.2% | I130-M114 | 83.1% |
|         | G116-H128 | 78.7% | G116-H128 | 73.9% |
|         | H128-G116 | 83.4% | H128-G116 | 84.5% |
| B9-β10  | F131-I144 | 91.9% | F131-I144 | 90.9% |
|         | I144-F131 | 85.8% | I144-F131 | 77.9% |
|         | Y133-K142 | 55.2% | Y133-K142 | 86.0% |
|         | K142-Y133 | 81.1% | K142-Y133 | 85.8% |
|         | C146-V129 | 85.2% | C146-V129 | 76.9% |
| β11-β12 | T156-K168 | 41.4% | T156-K168 | 75.5% |
|         | K168-T156 | 93.0% | K168-T156 | 87.4% |
|         | I158-E166 | 76.7% | I158-E166 | 61.7% |
|         | E166-I158 | 87.9% | E166-I158 | 76.7% |
| β12-β13 | Y165-G177 | 83.8% | Y165-G177 | 86.1% |
|         | G177-Y165 | 76.1% | G177-Y165 | 71.4% |
|         | V167-E175 | 66.6% | V167-E175 | 69.4% |
|         | E175-V167 | 74.3% | E175-V167 | 53.5% |
|         | I169-S172 | 87.3% | I169-S172 | 82.4% |
|         | S172-I169 | 73.2% | S172-I169 | 82.0% |
|         | V174-V167 | 92.1% | V174-V167 | 67.8% |

---
